# Supplementary material for: Sensitivity and Resistance of Oncogenic RAS-Driven Tumors to Dual MEK and ERK Inhibition
Source: MDPI journal article supplement (doi:10.3390/cancers13081852), 2021-04-13

# Full unedited gel for Figure 1D

$\alpha$ -DESMIN Sigma-Aldrich D1033  
 $\alpha$ -MYOGENIN Dako M3559

$\alpha$ -MYOD Dako M3512

DESMIN- 53 kDa  
MYOGENIN- 35 kDa

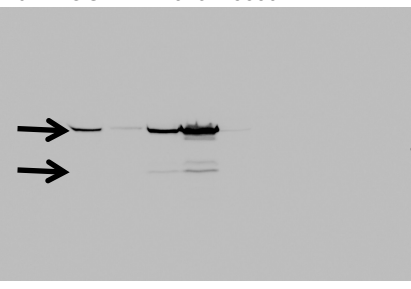

45 kDa

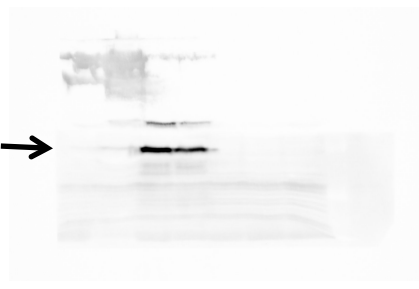

DESMIN- 53 kDa  
MYOGENIN- 35 kDa

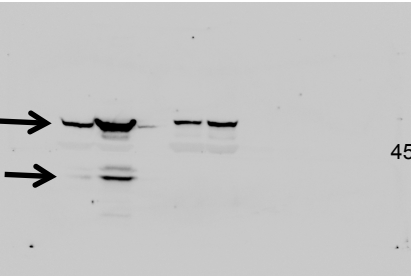

45 kDa

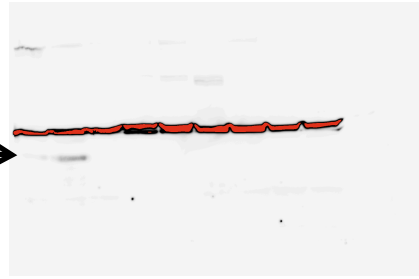

DESMIN- 53 kDa  
MYOGENIN- 35 kDa

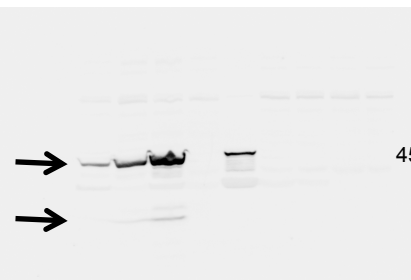

45 kDa

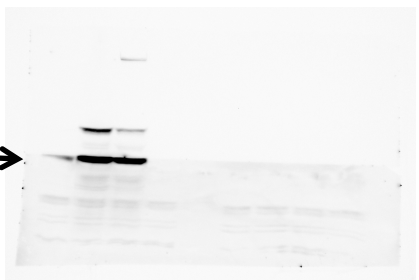

$\alpha$ -H-RAS Santa Cruz Biotechnology sc520

$\alpha$ - $\beta$ -ACTIN Sigma Aldrich A2228

21 kDa

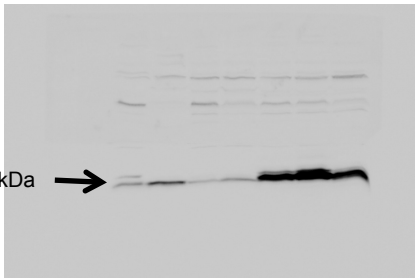

42 kDa

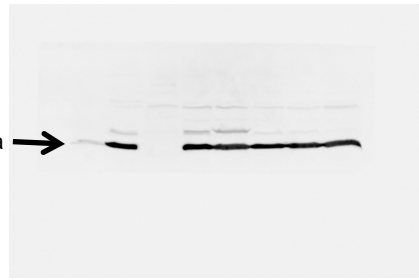

21 kDa

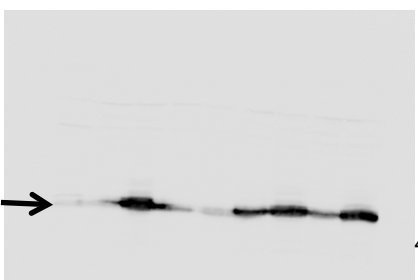

42 kDa

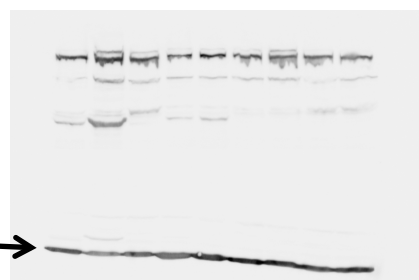

21 kDa

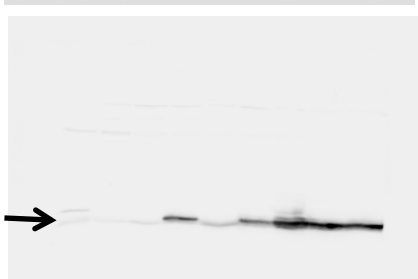

42 kDa

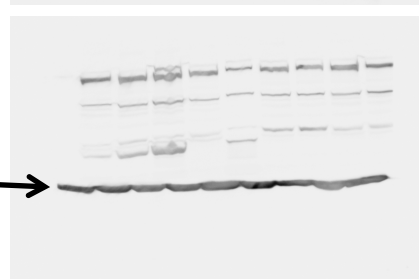

Full unedited gel for Figure 2E

$\alpha$ -phospho-Y1068-EGFR (D7A5)  
Cell Signaling 3777

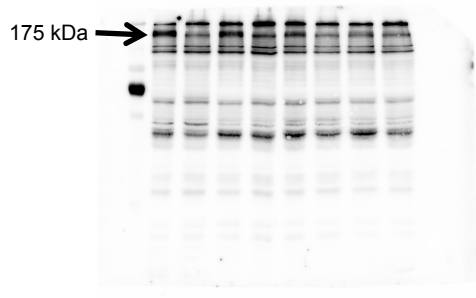

$\alpha$ -Total-EGFR (D38B1)  
Cell Signaling 4267

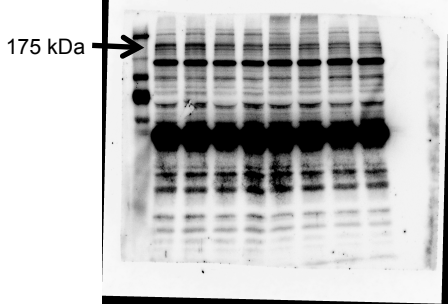

$\alpha$ -BRAF (H-145)  
Santa Cruz Biotechnology, sc-9002

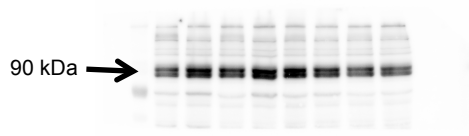

$\alpha$ -CRAF (C-12)  
Santa Cruz Biotechnology, sc-133

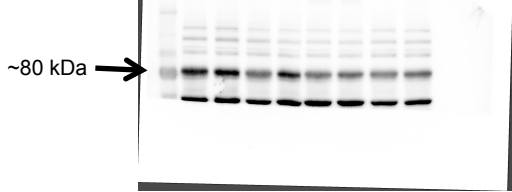

$\alpha$ -Total-MEK 1/2 Cell Signaling 9122

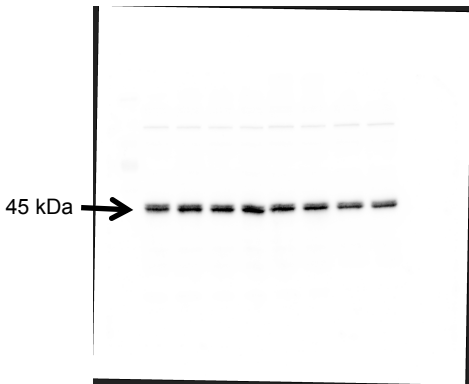

$\alpha$ -Phospho-S217/S221-MEK 1/2 (41G9)  
Cell Signaling 9154

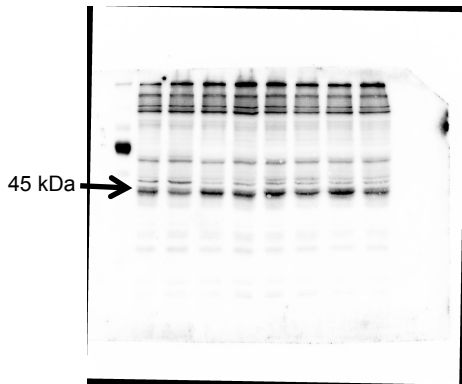

$\alpha$ -GAPDH Abcam, ab9484

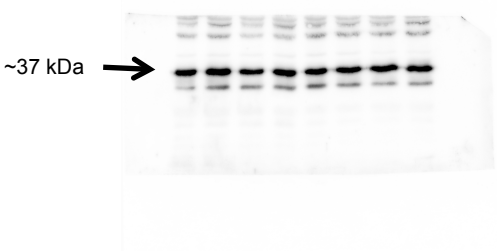

$\alpha$ -GAPDH Abcam, ab9484

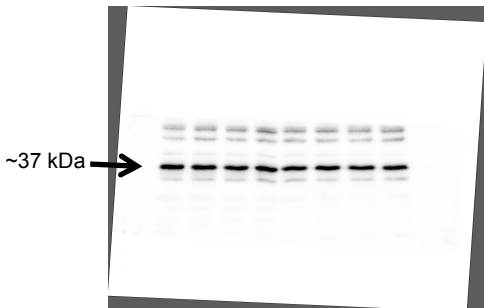

Full unedited gel for Figure 2F

$\alpha$ -Phospho-T308-AKT (C31E5E)  
Cell Signaling 2965

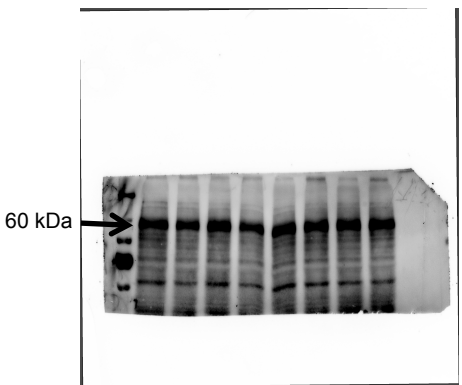

$\alpha$ -Total-AKT Cell Signaling, 9272

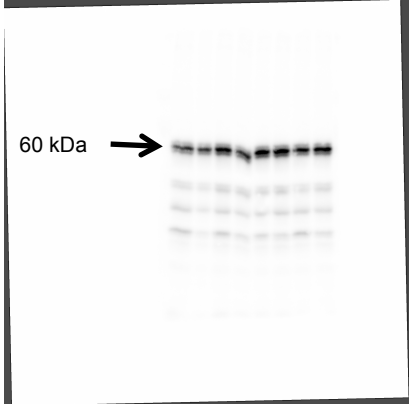

$\alpha$ -Total-ERK (137F5) Cell Signaling 4695S

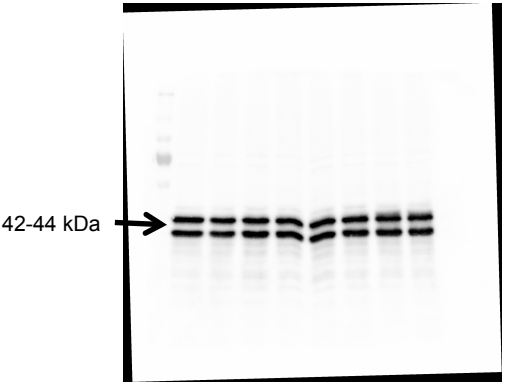

$\alpha$ -Phospho-T202/Y204-ERK Cell Signaling 9101

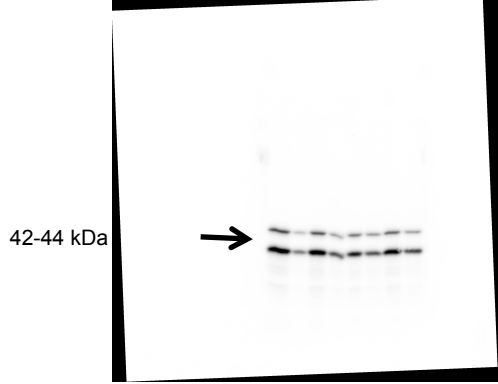

$\alpha$ -GAPDH Abcam, ab9484

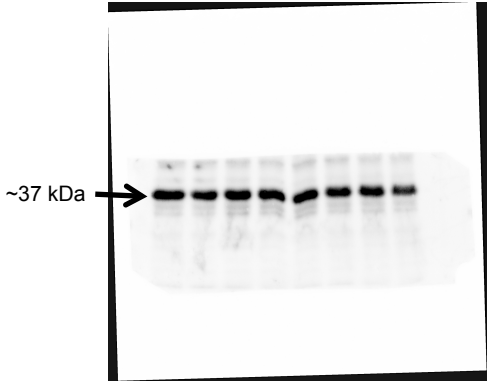

$\alpha$ -GAPDH Abcam, ab9484

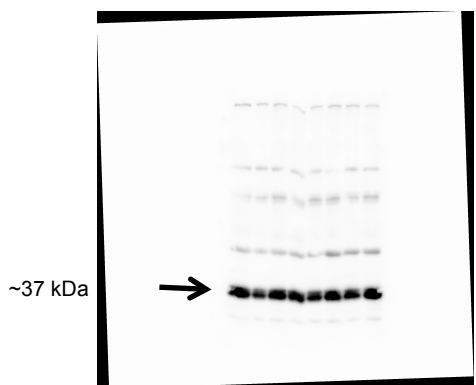

# Full unedited gel for Supplemental Figure 6

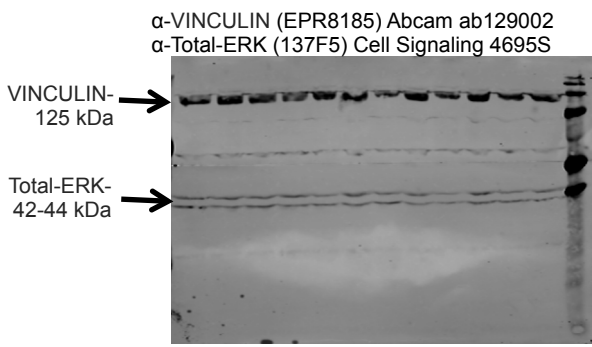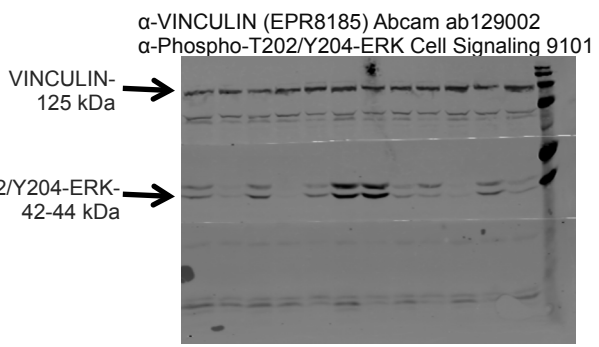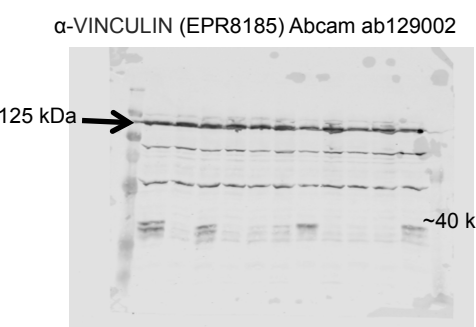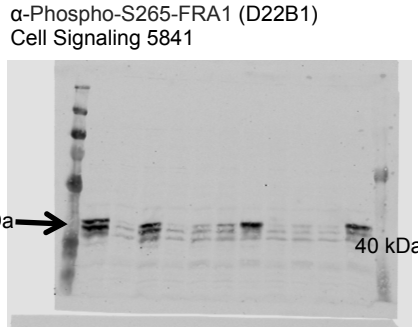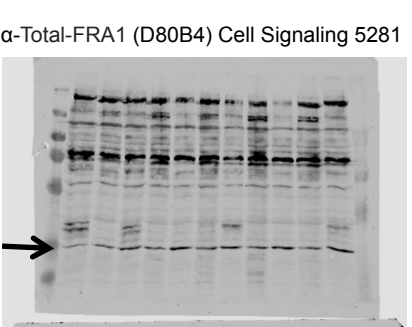

Supplement: s1 [file s1]
